# Supplementary material for: Methods for REM Sleep Density Analysis: A Scoping Review
Source: MDPI journal article supplement (doi:10.3390/clockssleep5040051), 2023-12-14
Supplement: s1 [file s1]

## METHODS FOR REM SLEEP DENSITY ANALYSIS: A SCOPING REVIEW

---

### SEARCH STRATEGY

Systematic review and meta-analysis – REM sleep density in people with depression

Total (Pubmed, Scopus, WoS, PsycInfo): 1,360

Total (deduplicated): 615

- **PubMed:** 269 records
  - Search date: 13/07/2022
  - ("REM density" OR (density AND (REM OR "eye movement\*" OR "Sleep, REM"[mesh]))) AND (depression[mesh] OR depression[tiab] OR depress\*[tiab] OR affective disorders[mesh] OR mood disorders[mesh])
- **Scopus:** 381 records
  - Search date: 13/07/2022
  - (TITLE-ABS-KEY ("REM density" OR (density AND (REM OR "eye movement\*")))) AND TITLE-ABS-KEY (depress\* OR "affective disorder\*" OR "mood disorder\*")
- **Web of Science** (all databases): 434 records
  - Search date: 13/07/2022
  - TS= (("REM density" OR (density AND (REM OR "eye movement\*")))) AND (depress\* OR "affective disorder\*" OR "mood disorder\*")
- **PsycInfo:** 276 records
  - Search date: 13/07/2022
  - ("REM density" OR (density AND (REM OR "eye movement\*")))) AND (depress\* OR "affective disorder\*" OR "mood disorder\*")
